# Supplementary material for: Cobalt metal organic framework (Co-MOF) derived CoSe2/C hybrid nanostructures for the electrochemical hydrogen evolution reaction supported by DFT studies
Source: Royal Society of Chemistry journal article supplement (doi:10.1039/d1nj05528c), 2022-01-01
Supplement: d1nj05528c1.pdf [file d1nj05528c1.pdf]

## Supporting Information

### **Cobalt Metal Organic Framework (Co-MOF) derived CoSe<sub>2</sub>/C hybrid nanostructures for Electrochemical Hydrogen Evolution Reaction Supported by DFT Studies**

*Rajat K. Tripathy, <sup>a, b, c</sup> Aneeya K. Samantara, <sup>a, b, c</sup> Pratap Mane <sup>d</sup>, Brahmananda Chakraborty\* <sup>b, e</sup> and J.N. Behera\* <sup>a, b, c</sup>*

<sup>a</sup> School of Chemical Sciences, National Institute of Science Education and Research (NISER), P. O. Jatni, Khurda 752050, Odisha, India. E-mail: [jnbehera@niser.ac.in](mailto:jnbehera@niser.ac.in)

<sup>b</sup> Homi Bhabha National Institute (HBNI), Mumbai-400094, India.

<sup>c</sup> Centre for Interdisciplinary Sciences (CIS), NISER, Jatni, Odisha, India 752050.

<sup>d</sup> Seismology Division, Bhabha Atomic Research Centre, Trombay, Mumbai-400085, India.

<sup>e</sup> High Pressure & Synchrotron Radiation Physics Division, Bhabha Atomic Research Centre, Trombay, Mumbai-400085, India. E-mail: [brahma@barc.gov.in](mailto:brahma@barc.gov.in)

\*Corresponding author.

Email addresses: [jnbehera@niser.ac.in](mailto:jnbehera@niser.ac.in)

[brahma@barc.gov.in](mailto:brahma@barc.gov.in)

**Calculation of electrochemical active surface area (ECSA):**

At first, the cyclic voltammograms at different scan rates in a non-Faradaic potential region were recorded and double layer capacitance ( $C_{dl}$ ) has been calculated by linear fitting the plot of cathodic and anodic current against scan rates. Since the ECSA is directly correlated to the values of  $C_{dl}$ , thus the ECSA has been calculated as per the following equation,

$$ECSA = \frac{C_{dl}}{C_s} \dots \dots \dots (1)$$

Here,  $C_s$  is the specific capacitance of an atomically smooth nanostructure in acidic medium and its value is  $35 \mu\text{F}/\text{cm}^2$ .

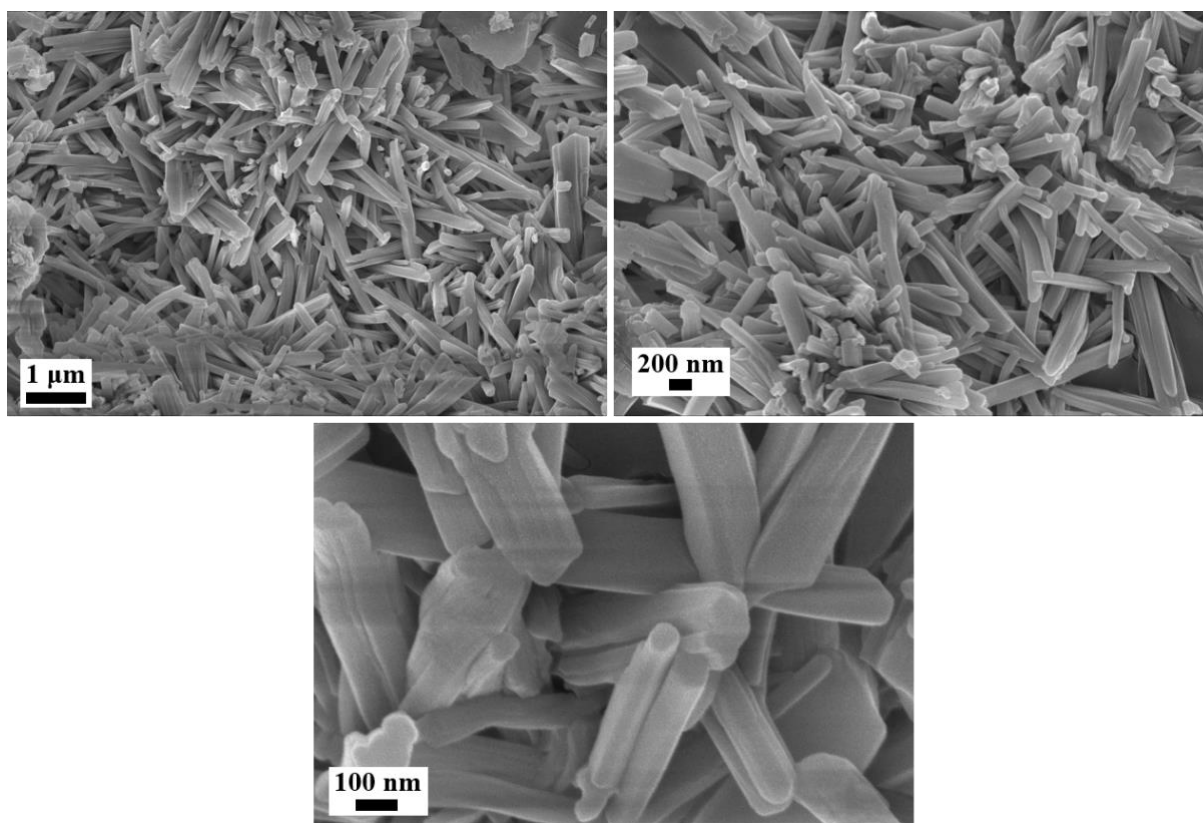

**Fig. S1.** FESEM images of Co-MOF.

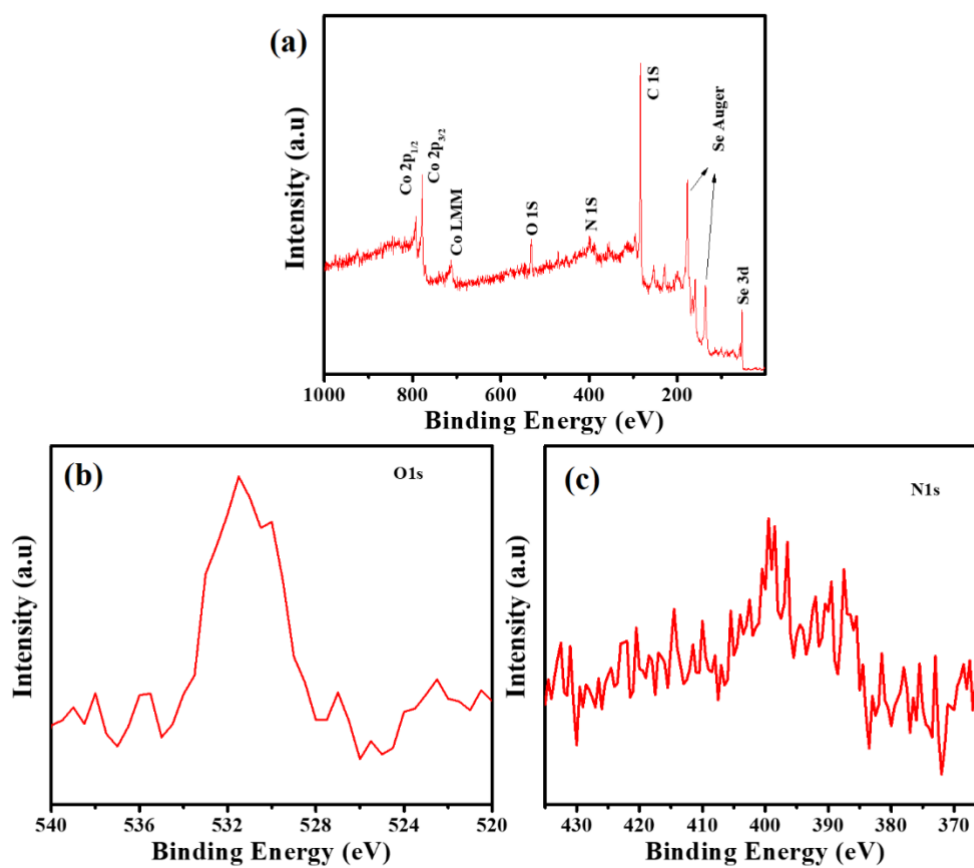

**Fig. S 2** (a) Survey spectrum and high resolution XPS spectrum of (b) O1s and (c) N1s of CoSe<sub>2</sub>/C hybrid.

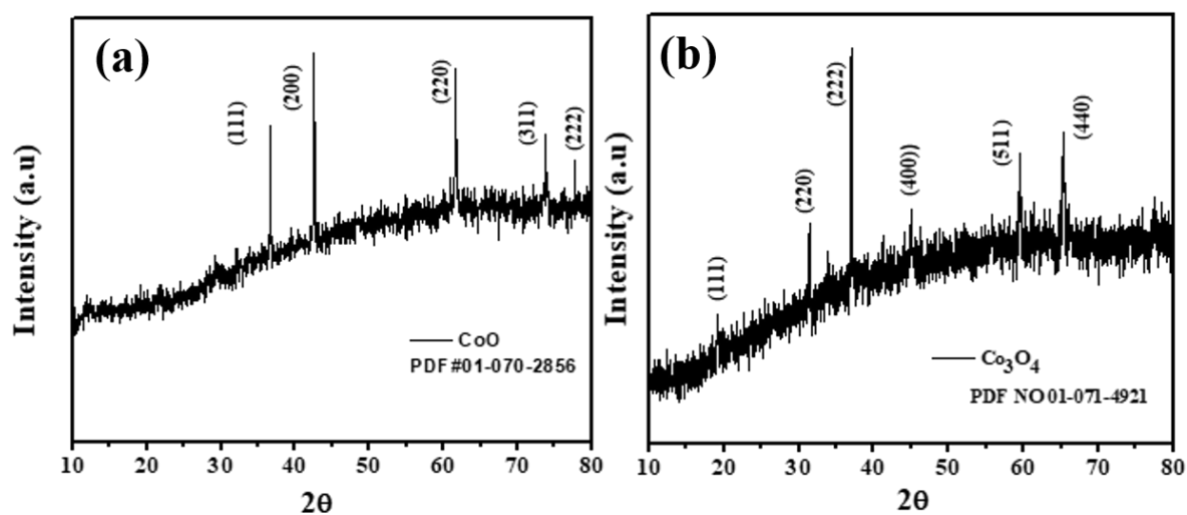

**Fig. S3.** Powder X-ray diffraction pattern of post TGA CoSe<sub>2</sub>/C hybrid sample (a) under the flow of nitrogen and (b) oxygen gas.

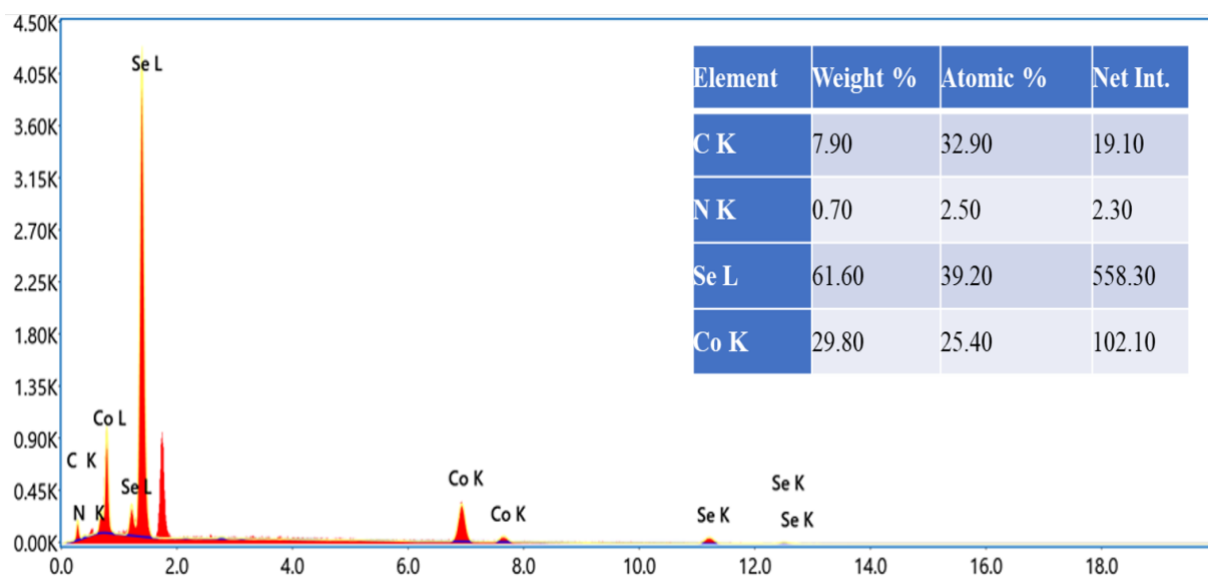

**Fig. S4.** EDS spectrum of CoSe<sub>2</sub>/C hybrid. The inset shows the weight and atomic percentage distribution of different elements.

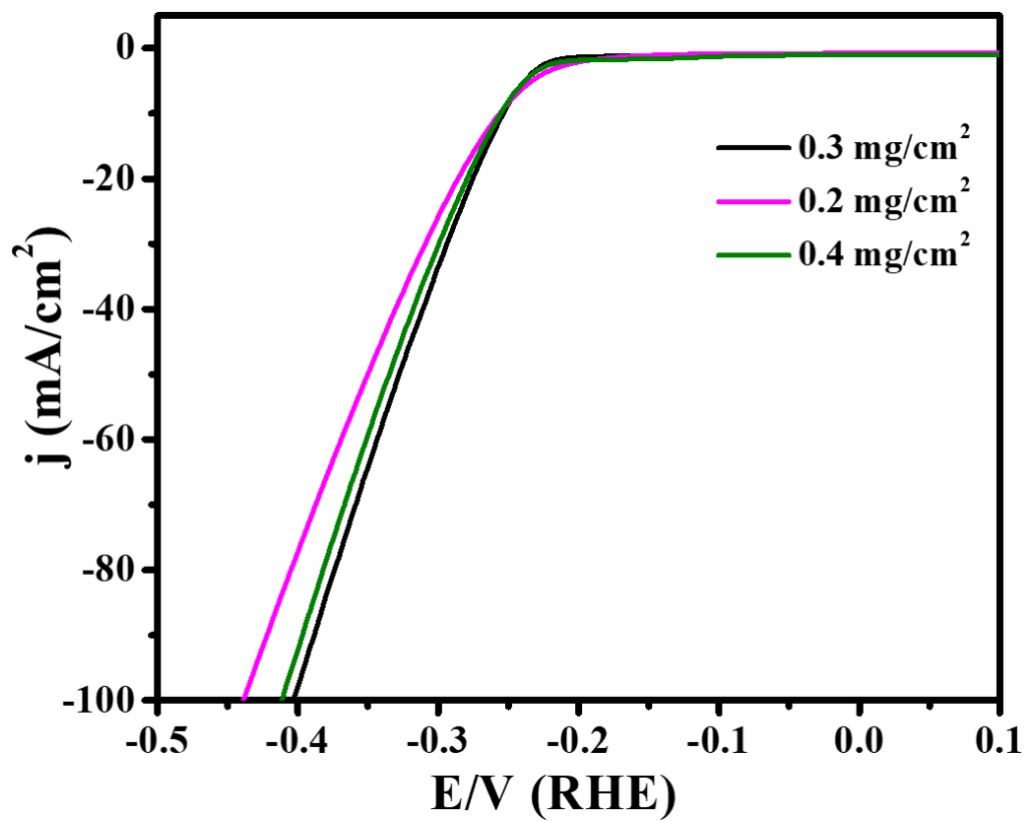

**Fig. S 5** LSVs showing the HER activity of  $\text{CoSe}_2/\text{C}$  modified electrode at different mass loading in 0.5 M  $\text{H}_2\text{SO}_4$  solution at a sweep rate of 5 mV/s.

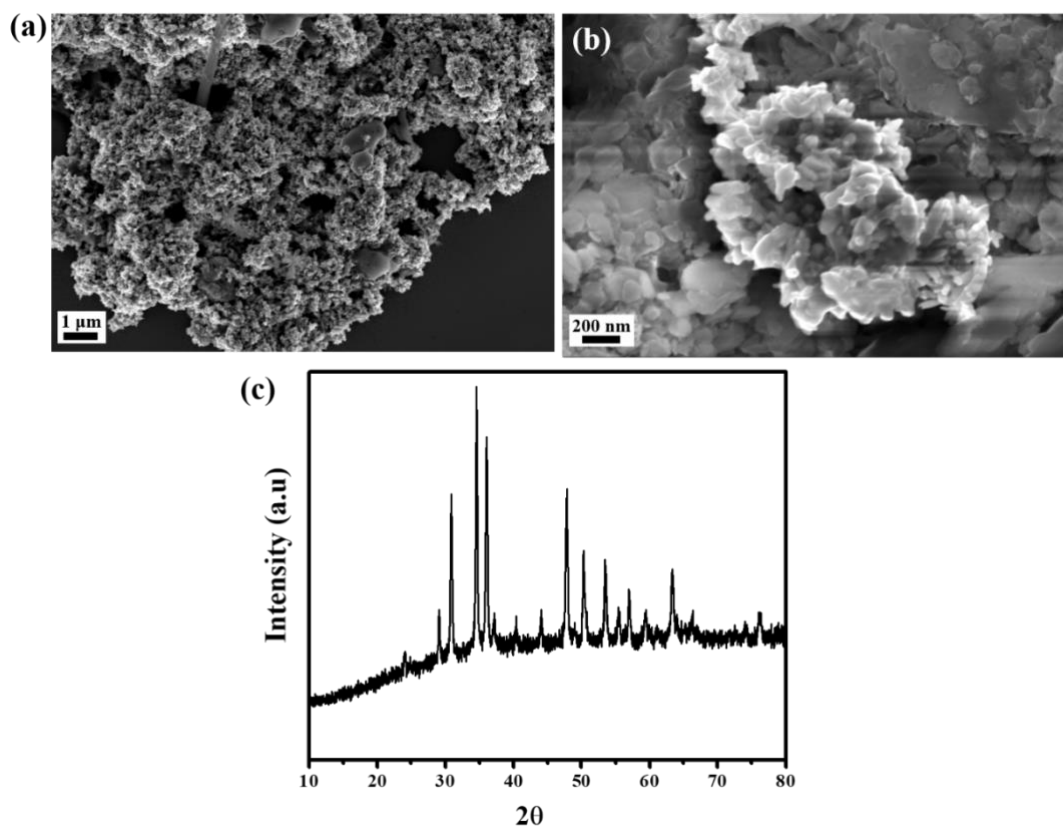

**Fig. S6.** FESEM (a, b) and PXRD of CoSe<sub>2</sub>/C after HER stability test.

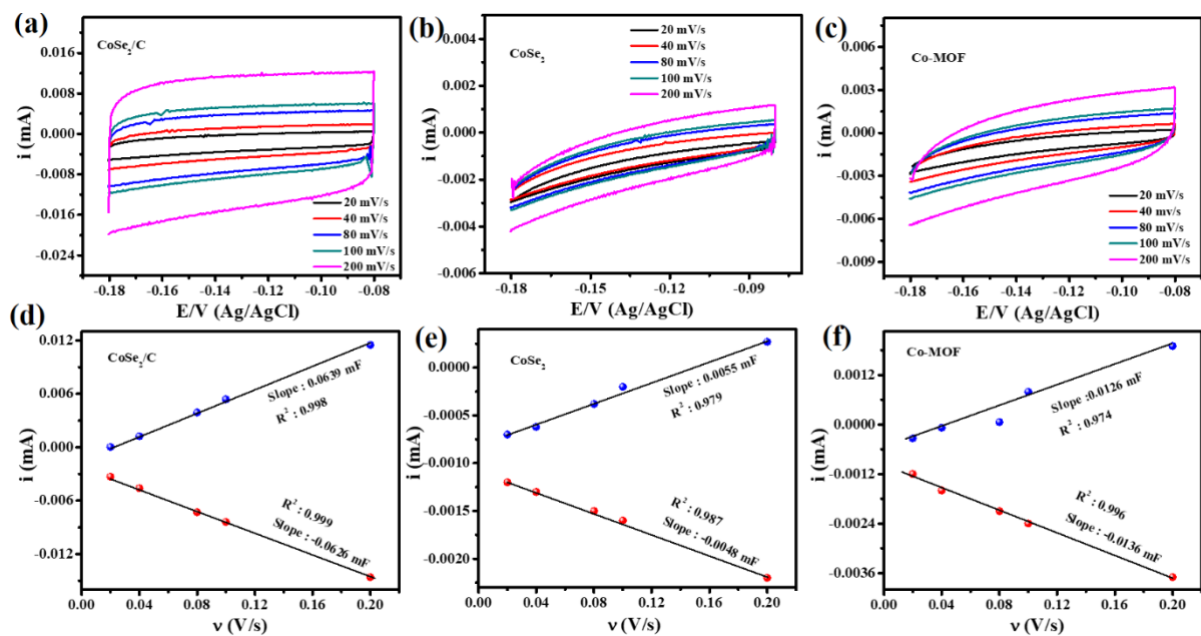

**Fig. S7** (a-c) Cyclic voltammograms showing the charging currents measured in a non-Faradaic region at a scan rate of 25, 50, 100, 150, 200 mV/s respectively and (d-f) the plot of cathodic and anodic charging currents measured at  $-0.13$  V (vs. Ag/AgCl) against scan rates for CoSe<sub>2</sub>/C, CoSe<sub>2</sub> and Co-MOF respectively.



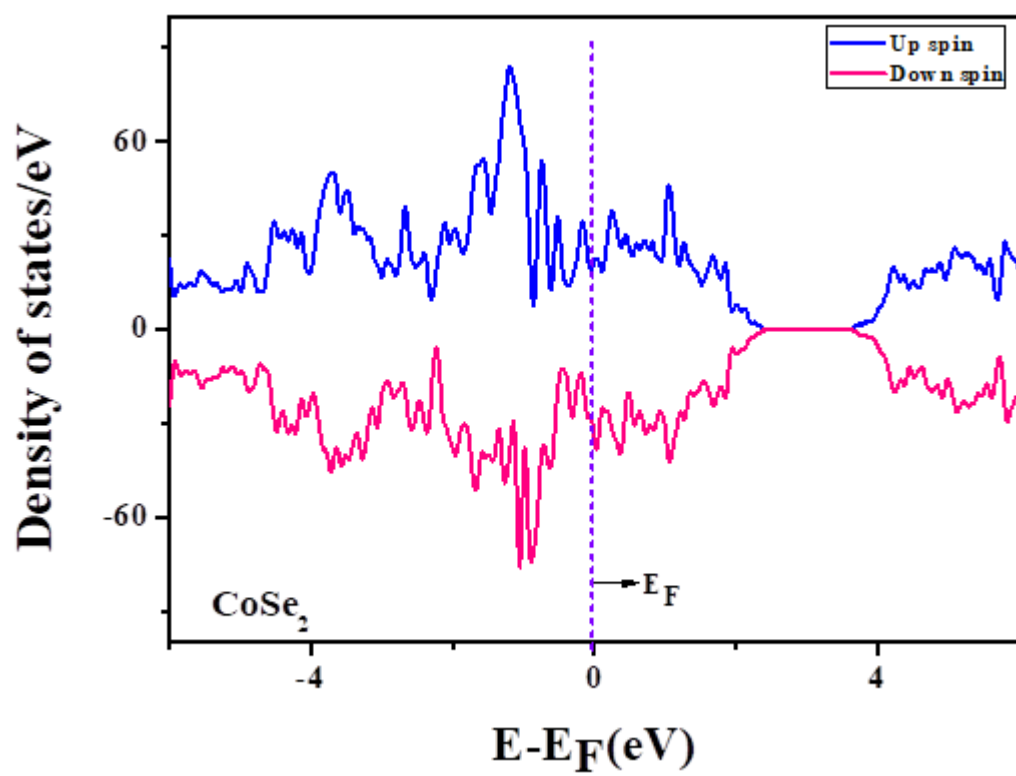

Fig. S8. TDOS plot for CoSe<sub>2</sub> (101) layer.

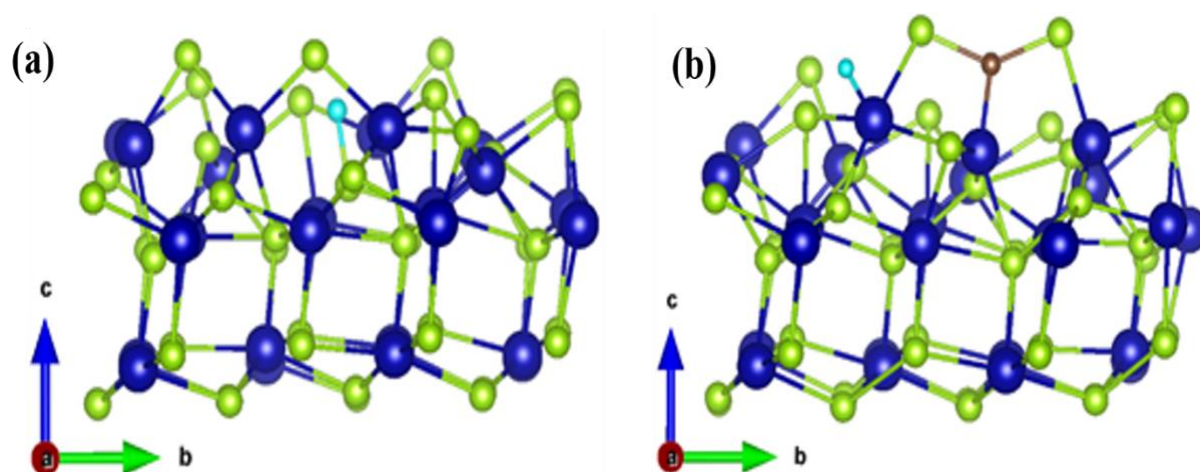

**Fig. S9.** DFT optimized structure after H adsorption for (101) layer of (a) CoSe<sub>2</sub> (b) CoSe<sub>2</sub> /C; blue, green, brown and cyan represent Cobalt, Selenium, Carbon and Hydrogen.

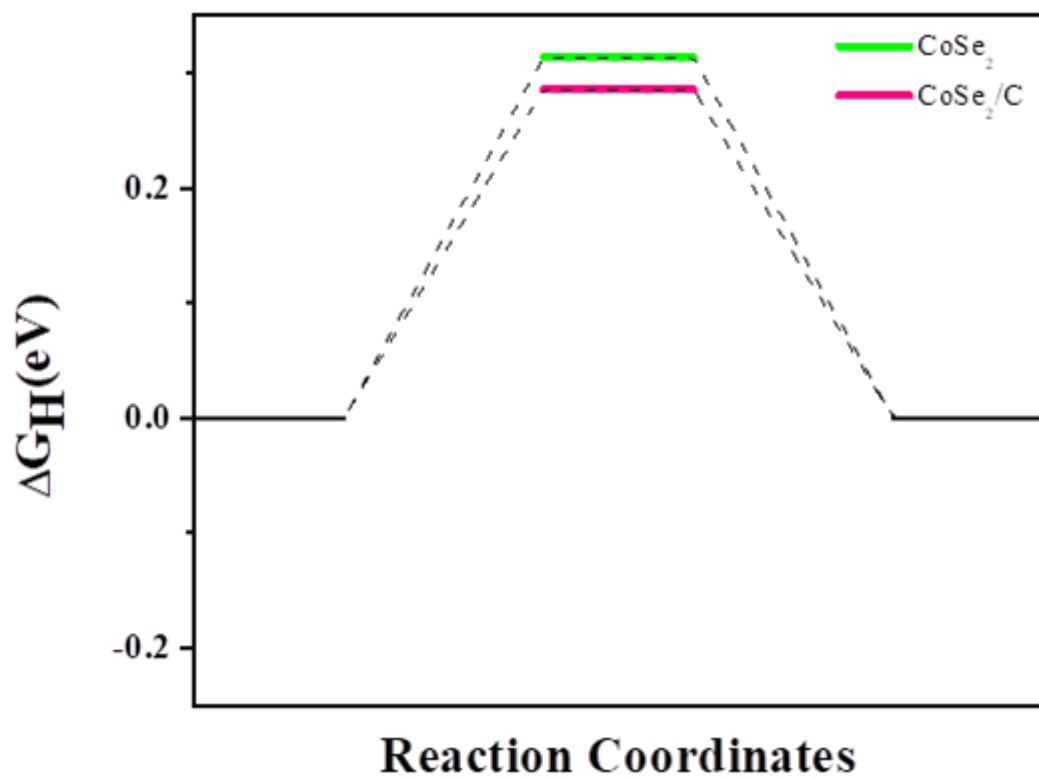

**Fig. S10.** Reaction coordinates for HER of (101) layer of  $\text{CoSe}_2$  and  $\text{CoSe}_2/\text{C}$ .

**Table S1.** Table showing the comparison of electrocatalytic activity of CoSe<sub>2</sub>/C hybrid with other reported nanostructures.

| Sl.No | Catalysts                           | Electrolyte (Conc.)                  | Overpotential(mV) @10 mA/cm <sup>-2</sup> | Tafel slope (mV/dec) | Reference                                                                    |
|-------|-------------------------------------|--------------------------------------|-------------------------------------------|----------------------|------------------------------------------------------------------------------|
| 1     | CoSe <sub>2</sub>                   | 0.5 M H <sub>2</sub> SO <sub>4</sub> | -272                                      | 60                   | ACS Energy Lett. 2016, 1, 3, 607-611                                         |
| 2     | CoSe <sub>2</sub> /C                | 0.5 M H <sub>2</sub> SO <sub>4</sub> | -196                                      | 45.73                | International journal of hydrogen energy, 2019, 44, 22787-22795              |
| 3     | CoSe <sub>2</sub> -CNT              | 0.5 M H <sub>2</sub> SO <sub>4</sub> | -174                                      | 37.8                 | Small, 2017, 13, 1700068                                                     |
| 4     | Co-NC/CNT                           | 1M KOH                               | -263                                      | 125                  | J. Mater. Chem. A, 2016, 4, 16057                                            |
| 5     | CoSe <sub>2</sub> /CF               | 1M KOH                               | -95                                       | 52.0                 | Nano Research 2016, 9, 2234–2243                                             |
| 6     | Carbon Supported Cobalt Di-selenide | 0.1M KOH                             | -270                                      | 118.5                | Journal of The Electrochemical Society, 2020 167 026507                      |
| 7     | CoSe <sub>2</sub> /SDGC             | 0.5 M H <sub>2</sub> SO <sub>4</sub> | -203                                      | 58.0                 | International journal of hydrogen energy, 2019, 44, 1344-13431               |
| 8     | CoSe <sub>2</sub>                   | 0.5 M H <sub>2</sub> SO <sub>4</sub> | -272.0                                    | 60.0                 | ACS Energy Lett, 2016, 1, 3, 607-611                                         |
| 9     | CoSe <sub>2</sub> /NC-170           | 0.5 M H <sub>2</sub> SO <sub>4</sub> | -159.                                     | 83.0                 | international journal of hydrogen energy 43 ( 2 0 1 8 ) 1 7 0 2 1 e1 7 0 2 9 |
| 10    | CoSe <sub>2</sub> /C                | 0.5 M H <sub>2</sub> SO <sub>4</sub> | -224.0                                    | 34.0                 | j. mater.sci,54.22 (2019): 14123-133                                         |
| 11    | Fe-CoSe <sub>2</sub> @NC            | 0.5 M H <sub>2</sub> SO <sub>4</sub> | -143                                      | 40.0                 | ACS Sustainable Chem. Eng. 2018, 6, 8672–8678                                |
| 12    | CoSe <sub>2</sub> /C                | 0.5 M H <sub>2</sub> SO <sub>4</sub> | -253.0                                    | 46.0                 | Present work                                                                 |
